# Supplementary material for: Mapping Quantitative Trait Loci for Cold Tolerance in Rice under Germination Stage by Whole Genome Resequencing and Analysis of Candidate Genes
Source: Research Square preprint supplement (doi:10.21203/rs.3.rs-101299/v1), 2020-11-05
Supplement: Supplementary file 1 [file 8cfbef961168059de24eeb8a.xlsx]

## Sheet: Sheet1
primer	sequence
8-1400-F	CACCACCTCTACGACCATGA
8-1400-R	GTTGAAGGCGTTGAGGTTGA
8-1390-F	ACCGTCGACTGGATCAACTT
8-1390-R	ACGGGTGCTTCAATGTCAAC
8-1380-F	TGAAGCTGATCACACCGGAC
8-1380-R	GAGGAAGCTCTGGTCGGAC
8-1370-F	ATGCTACGGACTGGCTTCAT
8-1370-R	CTCCGACTCTGCGATCTTCC
8-1360-F	CCCTTTTGTTTTGCGCAGTC
8-1360-R	ATGCATCCAGAGGTTCCACA
8-1350-F	ACTCCTTCCTCGGCTTCTTC
8-1350-R	GCTCTTCCAGTGTTGCCCTA
8-1330-F	AGCTACAAGGACCGCAAGTA
8-1330-R	TGTTCGTTTGATTGGAGGCG
8-1320-F	CGATACATGCAGACGTCACC
8-1320-R	GAAGCCAATCAGAGCAGAGC
8-1310-F	TTCACAGCCTTTCAACCTGC
8-1310-R	CACCGCTCTTGGGCATTTTA
8-1300-F	CTACTTTGTGGCGAGGCATC
8-1300-R	GCCACTGATGCTGGAGATTC
8-1280-F	CTTCCTCCTCCTCCATCGTC
8-1280-R	CACCCGCTTCCTCTTTGTTC
8-1274-F	TTAAAGGCGACAGATCCAGC
8-1274-R	GTCCCTCTCTCTTGCCTCTC
8-1270-F	TTTATGGGGCATGCACAAGG
8-1270-R	CCACACCAAAGTCTGCGATC
8-1260-F	AGCCGGTCATCATCTACACC
8-1260-R	TGTTGGAGGTGGAAAGGGAA
8-1250-F	TACCTACCTCCACTCCACCG
8-1250-R	TCCTAGAGTTGGCACGTCAG
8-1240-F	TCGATCAACCTGACCAACCA
8-1240-R	CGAAGAGGTAGGAGGTGCC
8-1230-F	GCTCCAAATCCAGCGTCAG
8-1230-R	GAGCCCGAAGAGAAGAGACT
8-1220-F	CTTTCCTCTCCGGCAACAAC
8-1220-R	TGGAACCTGAAGTAGCCGTT
8-1210-F	TCCTCCCTGACTTCTCCCAG
8-1210-R	CAGTCGAGCTTGATGTTGGG
8-1200-F	AGGAGTTCGATGGTCAAGGG
8-1200-R	TCTTTTCCCTTTCCCGACCA
8-1190-F	CTAGTGGCTTGCCGTATTCG
8-1190-R	AGCGGAGTTCATGGTCTTCA
8-1180-F	GAGTCTACCGCCTCATCCAG
8-1180-R	GGCAGTAGAATGAGCAAGCC
8-1170-F	GGTGTCGGACTCTGAGCTT
8-1170-R	CAGACCACCGCGTTGAAC
8-1160-F	CGGTGCTTGGGTCTGATAGA
8-1160-R	CGCCACAATGAAGAACTCGA
8-1140-F	CGATGAAGGCGGTGATCAAG
8-1140-R	GGTGGGTGTTGAAGATGAGC
8-1150-F	GCAGCCGGACTCAAATAAGG
8-1150-R	CCGGTGAAATCGACGAGTTG
8-1130-F	AAGGGTTCCGAGTTCTCCTG
8-1130-R	ATAGCCACCCTCCCCTATGA
8-1120-F	GCGTGGTAGTAGATCCGGAG
8-1120-R	CGGTGATGGCGTTGTAGATG
8-1090-F	TCCTCACCCTTGTCACACTC
8-1090-R	AGGCGTTCTTGTTGAGCATG
8-1100-F	GCGGCAAGAACAACAACAAC
8-1100-R	AAGGCTTCTTGTCCTCGTCA
8-1110-F	GCGTGGTAGTAGATCCGGAG
8-1110-R	CGGTGATGGCGTTGTAGATG
11-2980-F	CCAGTAACCCAACACAACGG
11-2980-R	CAAGTACAGCTCCTCCCCAA
11-2990-F	TGACCTCTCCTACATCAACCG
11-2990-R	TTCTTCTTGCCTTTCTCCCC
11-2970-F	ATTCGGAAAGGGATGGCTCA
11-2970-R	ATTTTGTCCAGATGCACGCA
11-2960-F	GTGATCGTGCTGGTGATGAC
11-2960-R	GCAGGTGTGGCAGTATTTCA
11-2940-F	CCCCAAGAACAAAAGAGCCA
11-2940-R	TAGCCCTCCTCCCTTGTTTG
11-2950-F	CTCATGGACCTCGCGCTG
11-2950-R	CGGCAAATGTTCCATCTCCG
11-2930-F	CGTAAACTACATCTCCACTCGC
11-2930-R	ACCAGCTCCCTCAACTTGTT
11-2920-F	TTGGAGGACGAGGATGATGG
11-2920-R	GCCATCCTTCAAGCACCTAG
11-2910-F	TGTTGTCACAGTGTCAGGGT
11-2910-R	CTTATCGCGAGCTCCTACCA
11-2890-F	ATGATGGCTTCGCGAGTCT
11-2890-R	GTCTCCCGCTTCTTCTTGTC
11-2900-F	TGGGTGGCTGCTCTTCTTAA
11-2900-R	TTCAAGCGGTCTTCAGAGGT
11-2880-F	ACCTCACGAGAAGCAGAGAC
11-2880-R	TGATCCATTCCCACAGGCTT
Ubq F	ACCCTGGCTGACTACAACATC
Ubq R	AGTTGACAGCCCTAGGGTG
